# Supplementary material for: Charting the human amygdala development across childhood and adolescence: Manual and automatic segmentation
Source: PubMed Central journal article supplement — Dev Cogn Neurosci. 2021 Oct 28;52:101028. doi: 10.1016/j.dcn.2021.101028 (PMC8578043; doi:10.1016/j.dcn.2021.101028), 2021-10-28
Supplement: mmc1.pdf [file mmc1.pdf]

## Supplementary Figures

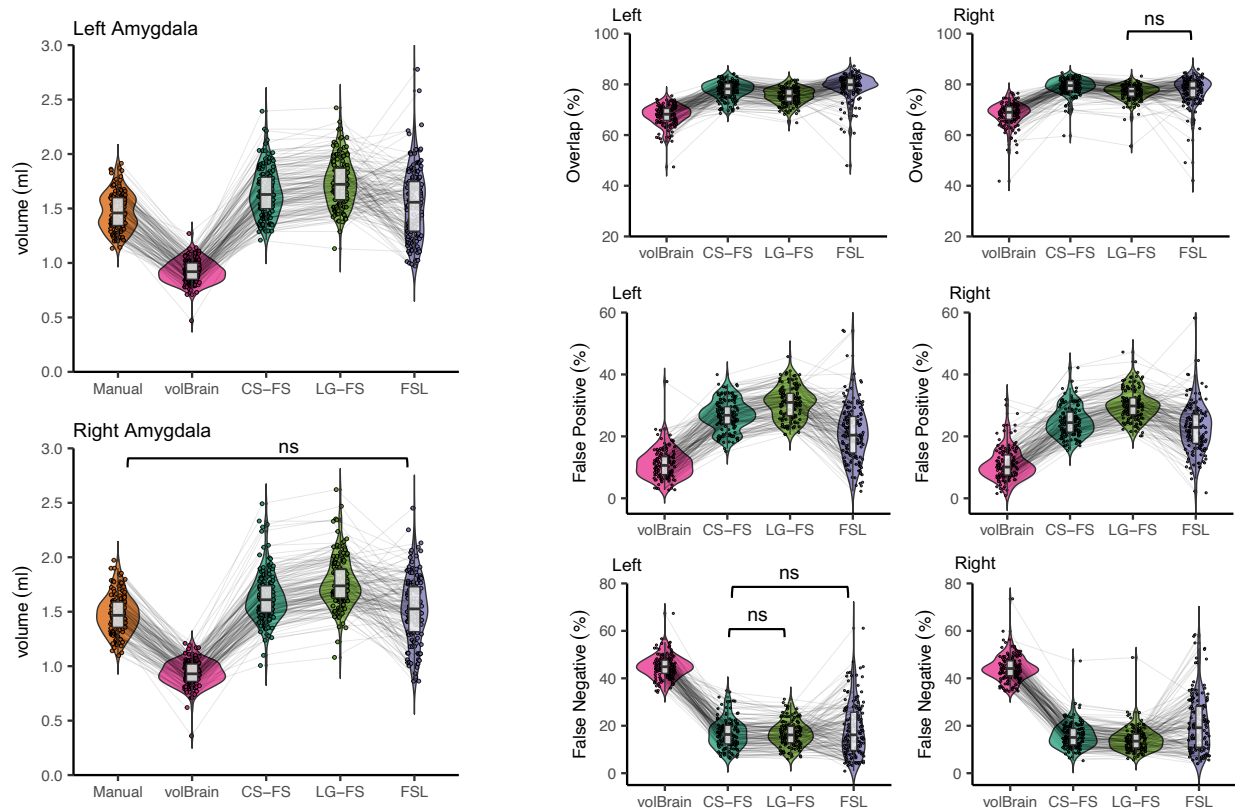

**Figure S1.** Volumes produced by each method for the second-wave samples as above. Horizontal bars indicate non-significant differences between manual and automated methods on pairwise comparisons. In the left and right amygdala, spatial overlap, false positive rate and false negative rate for segmentation using *volBrain*, CS-FS, LG-FS and *FSL* compared to the manual “gold standard”. Horizontal bars indicate non-significant test for difference in percent volume overlap, false-positive rate and false-negative rate. The remaining comparisons showed significant differences.

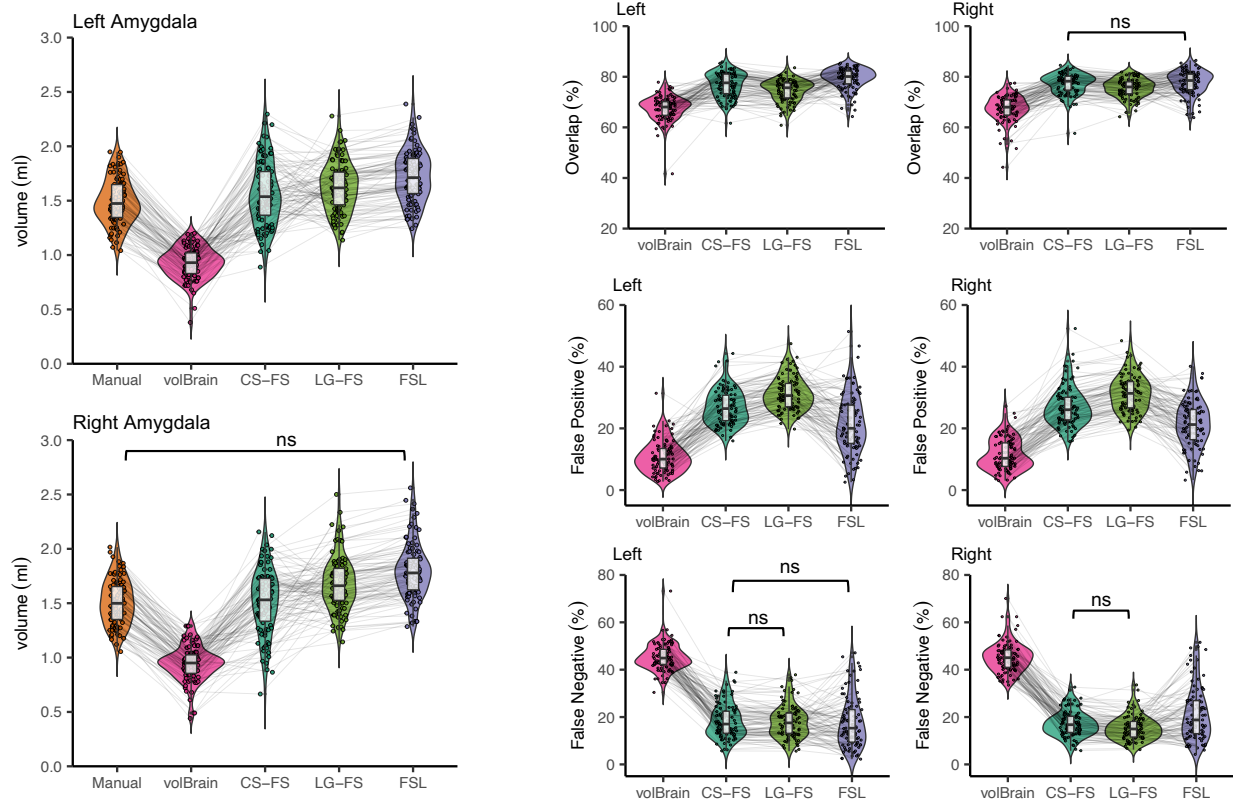

**Figure S2.** Volumes produced by each method for the third-wave samples as above. Brackets indicate non-significant differences between manual and automated methods on pairwise comparisons. In the left and right amygdala, spatial overlap, false positive rate and false negative rate for segmentation using *volBrain*, CS-FS, LG-FS and *FSL* compared to the manual “gold standard”. Horizontal bars indicate non-significant test for difference in percent volume overlap, false-positive rate and false-negative rate. The remaining comparisons showed significant differences.

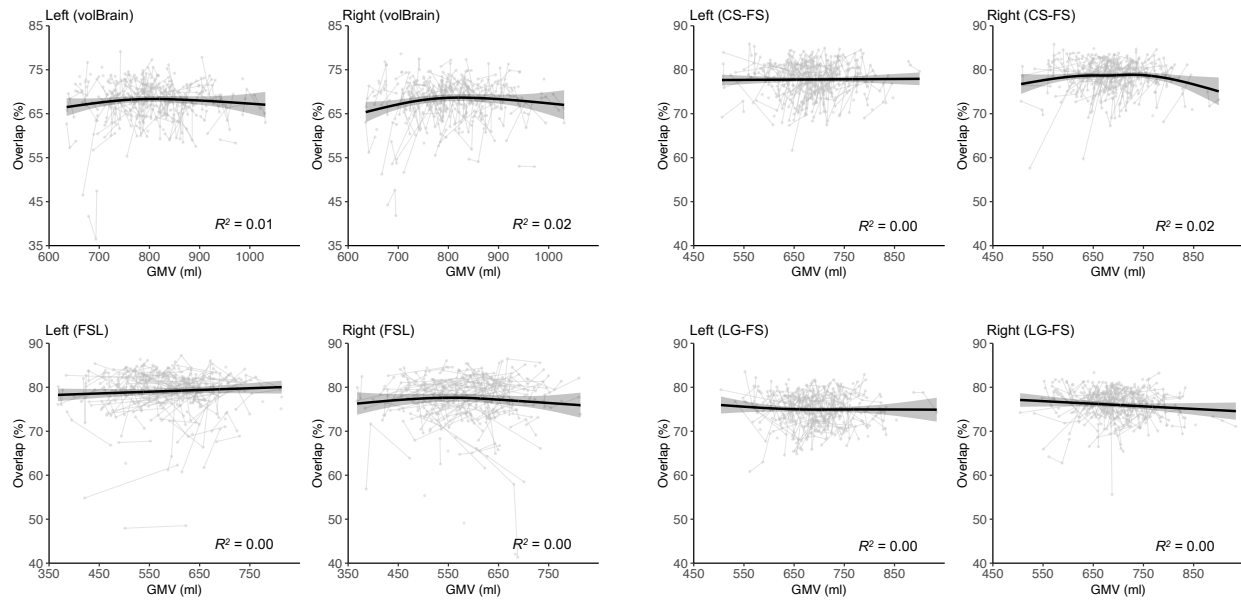

**Figure S3.** Plots of percent spatial overlap between volumes obtained by automated methods with manual tracing for bilateral amygdala versus GMV. \* $p < 0.05$ ; \*\* $p < 0.01$ ; \*\*\* $p < 0.001$

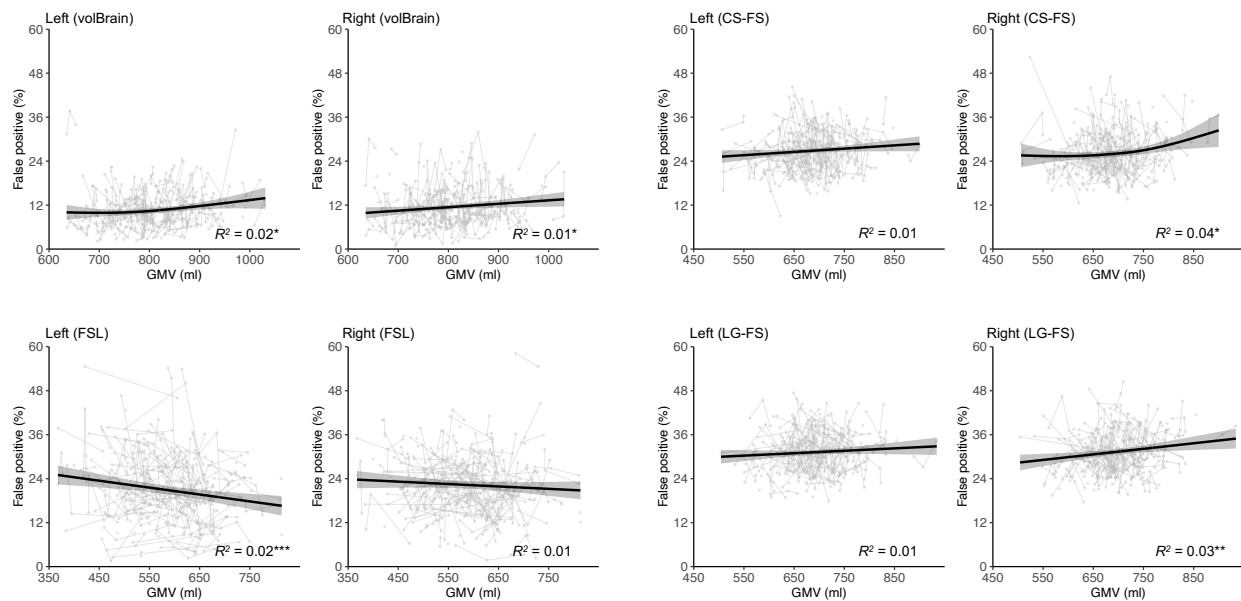

**Figure S4.** Plots of percent false positive of automated methods for segmenting bilateral amygdala versus GMV. \* $p < 0.05$ ; \*\* $p < 0.01$ ; \*\*\* $p < 0.001$

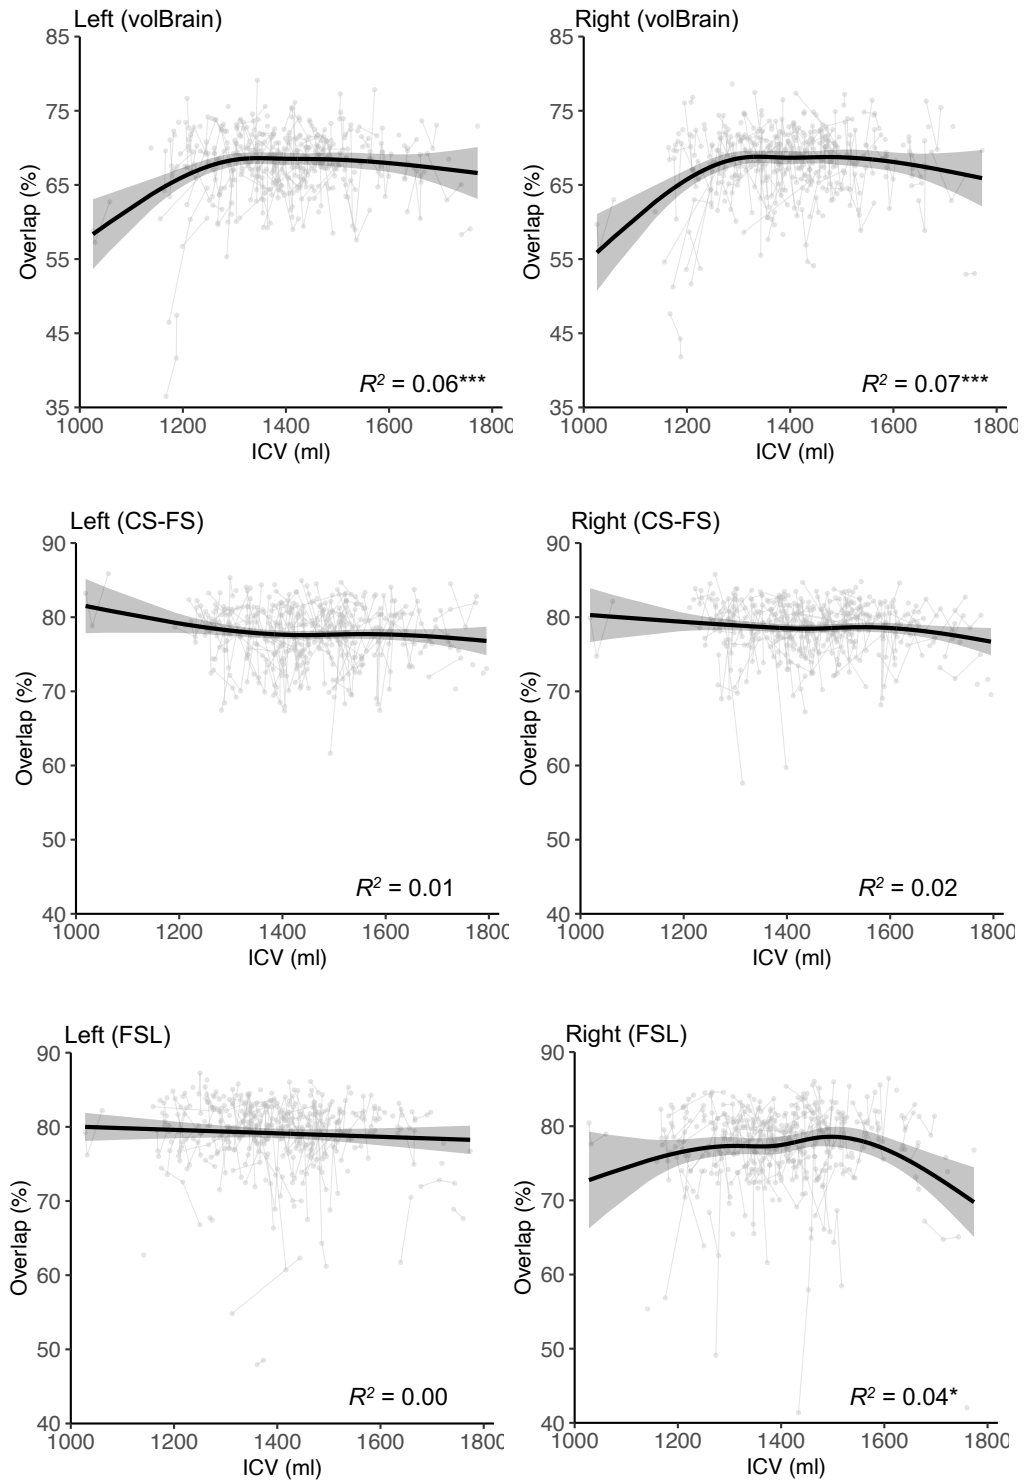

**Figure S5.** Plots of percent spatial overlap between volumes obtained by automated methods with manual tracing for bilateral amygdala versus ICV. \* $p < 0.05$ ; \*\* $p < 0.01$ ; \*\*\* $p < 0.001$

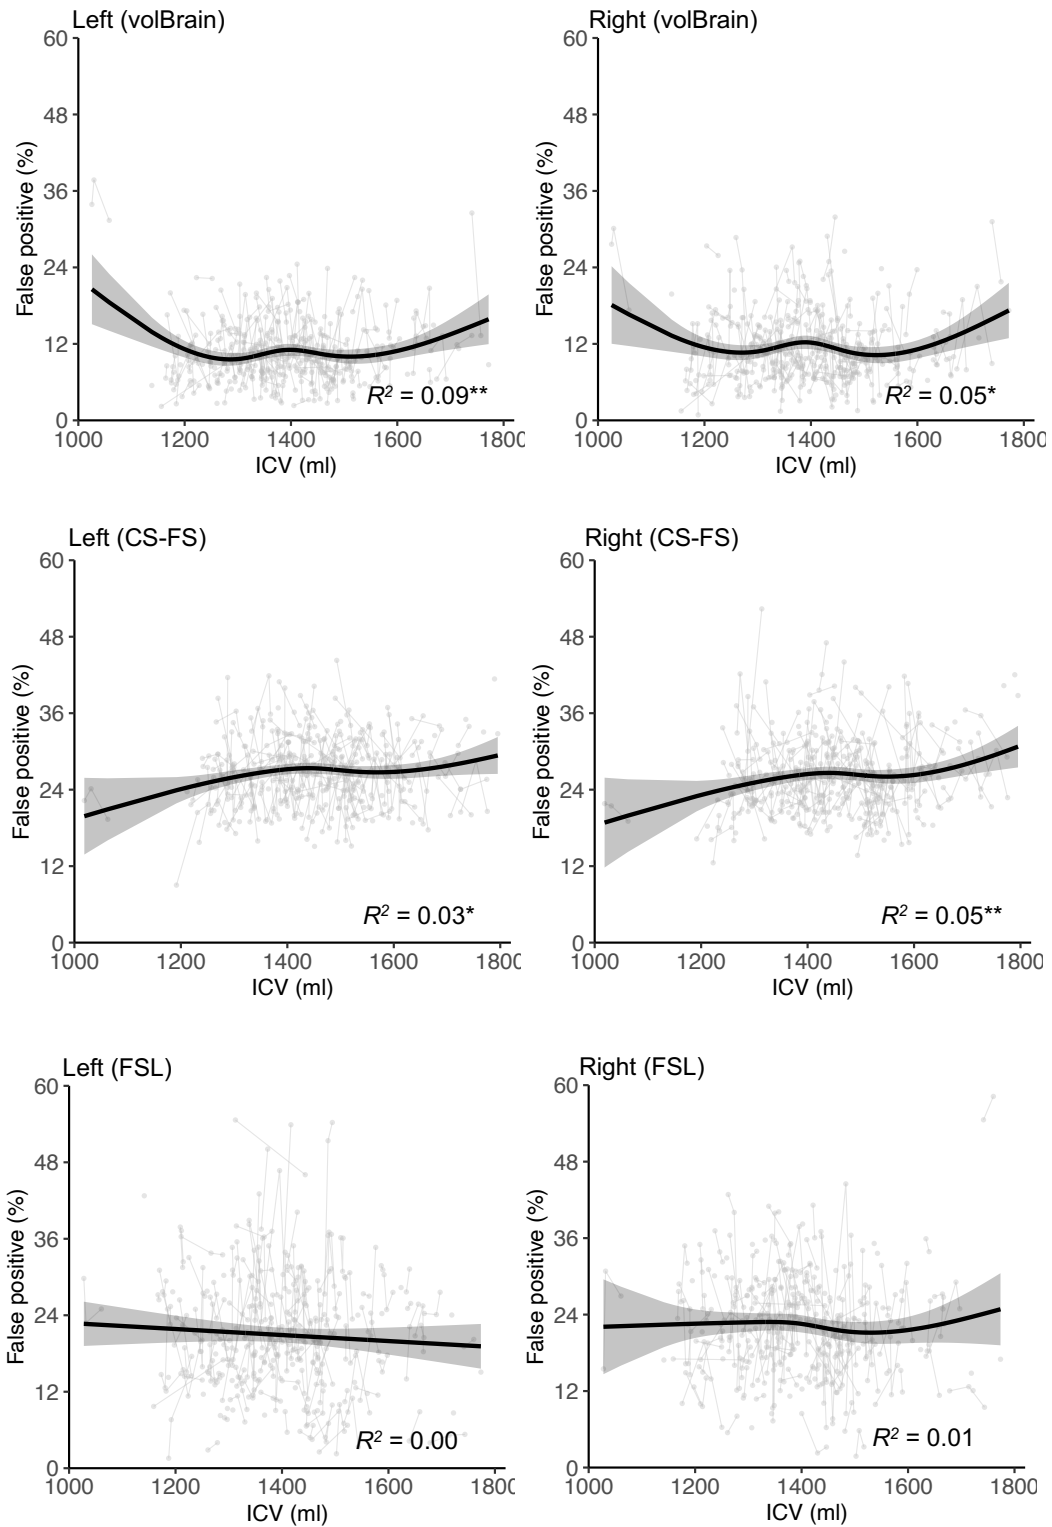

**Figure S6.** Plots of percent false positive of automated methods for segmenting bilateral amygdala versus ICV. \* $p < 0.05$ ; \*\* $p < 0.01$ ; \*\*\* $p < 0.001$

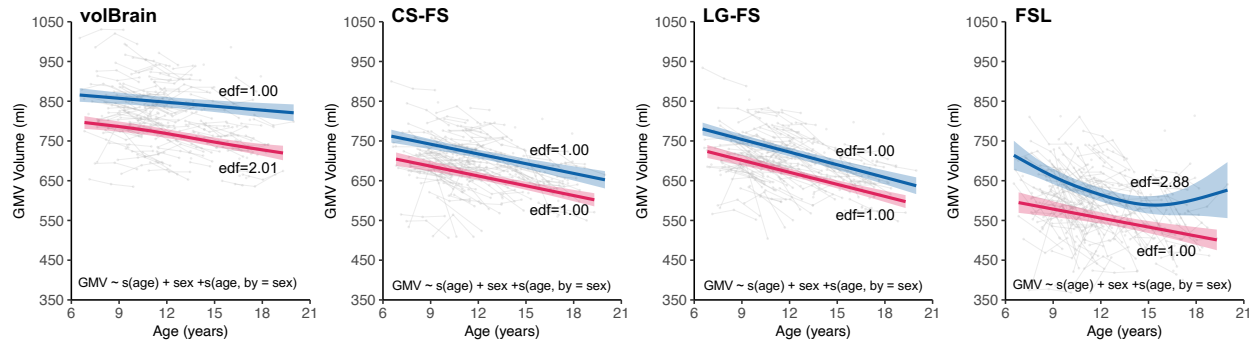

**Figure S7.** Longitudinal developmental trajectories of GMV traced by volBrain, CS-FS, LG-FS and FSL. The blue color indicates trajectories for boys, while the red color indicates trajectories for girls. The trajectories are surrounded by shaded 95% confidence intervals.

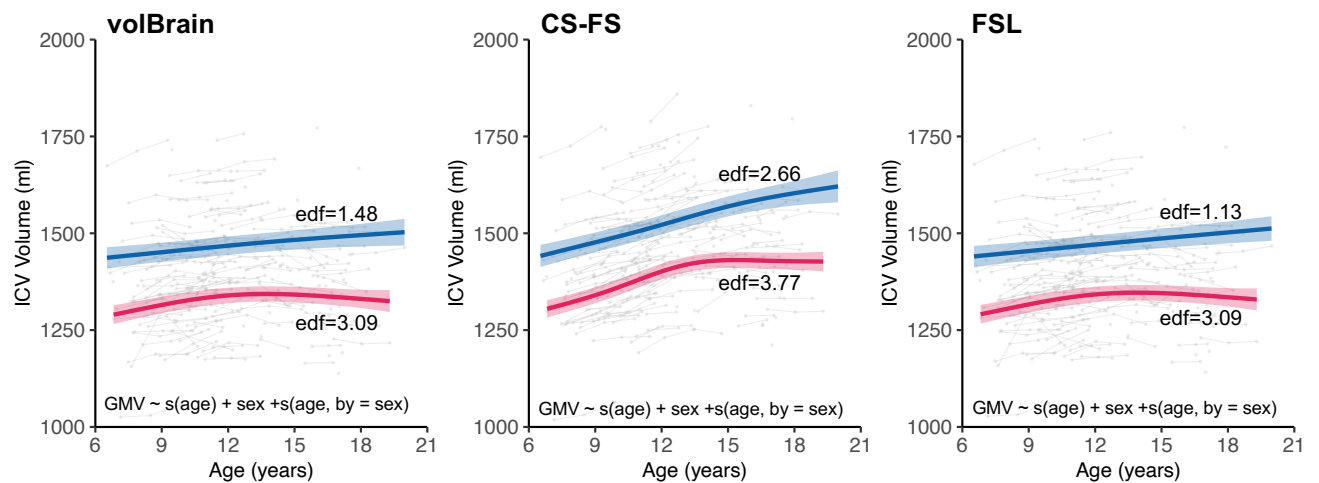

**Figure S8.** Longitudinal developmental trajectories of ICV traced by volBrain, CS-FS and FSL. The blue color indicates trajectories for boys, while the red color indicates trajectories for girls. The trajectories are surrounded by shaded 95% confidence intervals.
