# Supplementary material for: Charting the human amygdala development across childhood and adolescence: Manual and automatic segmentation
Source: PubMed Central journal article supplement — Dev Cogn Neurosci. 2021 Oct 28;52:101028. doi: 10.1016/j.dcn.2021.101028 (PMC8578043; doi:10.1016/j.dcn.2021.101028), 2021-10-28
Supplement: mmc2.pdf [file mmc2.pdf]

**Supplement Table S1**

GAMM estimates of percent spatial overlap for manual segmentation for bilateral amygdala across volBrain, CS-FS, LG-FS and FSL methods (CJV and SNR included as covariates).

| Amygdala<br>measure<br>method | Hemisphere     | $R^2$<br>(adjusted) | CJR      |       |       |              | SNR      |      |      |              | Volume spline |        |       |              |
|-------------------------------|----------------|---------------------|----------|-------|-------|--------------|----------|------|------|--------------|---------------|--------|-------|--------------|
|                               |                |                     | Estimate | SE    | t     | p-value      | Estimate | SE   | t    | P-value      | edf           | Red.df | F     | p-value      |
| volBrain                      | Left amygdala  | 0.04                | -19.21   | 11.02 | -1.74 | 0.082        | 0.51     | 0.25 | 2.01 | <b>0.046</b> | 3.72          | 3.72   | 10.77 | <b>0.000</b> |
|                               | Right amygdala | 0.06                | -21.37   | 11.94 | -1.79 | 0.074        | 0.24     | 0.27 | 0.87 | 0.383        | 3.36          | 3.36   | 7.98  | <b>0.000</b> |
| CS-FS                         | Left amygdala  | 0.02                | -29.89   | 10.39 | -2.88 | <b>0.004</b> | 0.18     | 0.22 | 0.80 | 0.423        | 1.00          | 1.00   | 9.09  | <b>0.003</b> |
|                               | Right amygdala | 0.09                | -33.69   | 9.32  | -3.61 | <b>0.000</b> | 0.43     | 0.20 | 2.15 | <b>0.032</b> | 3.06          | 3.06   | 8.12  | <b>0.000</b> |
| LG-FS                         | Left amygdala  | 0.07                | -14.24   | 9.50  | -1.50 | 0.134        | 0.63     | 0.21 | 3.01 | <b>0.003</b> | 1.72          | 1.72   | 28.31 | <b>0.000</b> |
|                               | Right amygdala | 0.08                | -18.60   | 12.62 | -1.47 | 0.141        | 0.77     | 0.26 | 2.92 | <b>0.004</b> | 2.56          | 2.56   | 7.71  | <b>0.000</b> |
| FSL                           | Left amygdala  | 0.05                | -5.58    | 11.56 | -0.48 | 0.629        | 0.19     | 0.27 | 0.72 | 0.474        | 3.26          | 3.26   | 7.10  | <b>0.000</b> |
|                               | Right amygdala | 0.02                | -0.09    | 14.32 | -0.01 | 0.995        | 0.15     | 0.34 | 0.43 | 0.666        | 2.26          | 2.26   | 1.85  | 0.157        |

Smooth function (edf) as well as degrees of freedom (Ref.df) and *F*-statistic and associated *p*-value (bold highlights  $p < .05$ ) for age.

**Supplement Table S2**

GAMM estimates for bilateral amygdala volume across both sexes in manual tracing, volBrain, CS-FS, LG-FS and FSL segmentation separately, including a linear growth model of GMV.

| GMV measure method | Amygdala measure method | Hemisphere     | Best model fit  | R <sup>2</sup> (adjusted) | GMV      |      |       |              | Sex      |      |      |              | Age spline |        |       |              |
|--------------------|-------------------------|----------------|-----------------|---------------------------|----------|------|-------|--------------|----------|------|------|--------------|------------|--------|-------|--------------|
|                    |                         |                |                 |                           | Estimate | SE   | t     | P-value      | Estimate | SE   | t    | P-value      | edf        | Red.df | F     | P-value      |
| volBrain           | Manual                  | Left amygdala  | GMV + age       | 0.25                      | 0.00     | 0.00 | 9.10  | <b>0.000</b> |          |      |      |              | 1.00       | 1.00   | 25.74 | <b>0.000</b> |
|                    |                         | Right amygdala | GMV + age       | 0.25                      | 0.00     | 0.00 | 9.15  | <b>0.000</b> |          |      |      |              | 1.00       | 1.00   | 30.45 | <b>0.000</b> |
|                    | volBrain                | Left amygdala  | GMV + age       | 0.30                      | 0.00     | 0.00 | 10.87 | <b>0.000</b> |          |      |      |              | 1.90       | 1.90   | 19.45 | <b>0.000</b> |
|                    |                         | Right amygdala | GMV + age       | 0.32                      | 0.00     | 0.00 | 11.28 | <b>0.000</b> |          |      |      |              | 1.00       | 1.00   | 41.46 | <b>0.000</b> |
| FreeSurfer         | Manual                  | Left amygdala  | GMV + age       | 0.24                      | 0.00     | 0.00 | 9.11  | <b>0.000</b> |          |      |      |              | 2.17       | 2.17   | 13.91 | <b>0.000</b> |
|                    |                         | Right amygdala | GMV + age       | 0.25                      | 0.00     | 0.00 | 9.27  | <b>0.000</b> |          |      |      |              | 1.41       | 1.41   | 22.98 | <b>0.000</b> |
|                    | FreeSurfer              | Left amygdala  | GMV + age       | 0.36                      | 0.00     | 0.00 | 12.90 | <b>0.000</b> |          |      |      |              | 1.40       | 1.40   | 18.95 | <b>0.000</b> |
|                    |                         | Right amygdala | GMV + sex + age | 0.42                      | 0.00     | 0.00 | 10.54 | <b>0.000</b> | 0.09     | 0.03 | 3.28 | <b>0.001</b> | 1.89       | 1.89   | 14.39 | <b>0.000</b> |
| LP-FS              | Manual                  | Left amygdala  | GMV + sex + age | 0.26                      | 0.00     | 0.00 | 6.49  | <b>0.000</b> | 0.07     | 0.02 | 3.18 | <b>0.002</b> | 1.00       | 1.00   | 31.56 | <b>0.000</b> |
|                    |                         | Right amygdala | GMV + sex + age | 0.26                      | 0.00     | 0.00 | 6.73  | <b>0.000</b> | 0.07     | 0.02 | 2.95 | <b>0.003</b> | 1.11       | 1.11   | 32.41 | <b>0.000</b> |
|                    | LP-FS                   | Left amygdala  | GMV + sex + age | 0.32                      | 0.00     | 0.00 | 7.23  | <b>0.000</b> | 0.09     | 0.03 | 3.51 | <b>0.001</b> | 1.91       | 1.91   | 14.24 | <b>0.000</b> |
|                    |                         | Right amygdala | GMV + sex + age | 0.40                      | 0.00     | 0.00 | 7.52  | <b>0.000</b> | 0.15     | 0.03 | 5.36 | <b>0.000</b> | 1.76       | 1.76   | 15.84 | <b>0.000</b> |
| FSL                | Manual                  | Left amygdala  | GMV + sex + age | 0.21                      | 0.00     | 0.00 | 5.11  | <b>0.000</b> | 0.09     | 0.02 | 4.07 | <b>0.000</b> | 2.39       | 2.39   | 9.40  | <b>0.000</b> |
|                    |                         | Right amygdala | GMV + sex + age | 0.18                      | 0.00     | 0.00 | 4.12  | <b>0.000</b> | 0.10     | 0.02 | 4.20 | <b>0.000</b> | 1.85       | 1.85   | 10.76 | <b>0.000</b> |
|                    | FSL                     | Left amygdala  | GMV + age       | 0.12                      | 0.00     | 0.00 | 1.94  | 0.053        |          |      |      |              | 3.13       | 3.13   | 21.02 | <b>0.000</b> |
|                    |                         | Right amygdala | GMV + age       | 0.08                      | 0.00     | 0.00 | 2.78  | <b>0.006</b> |          |      |      |              | 2.77       | 2.77   | 13.65 | <b>0.000</b> |

Smooth function (edf) as well as degrees of freedom (Ref.df) and *F*-statistic and associated *p*-value (bold highlights  $p < .05$ ) for age. LP-FS = Longitudinal pipeline of FreeSurfer

**Supplement Table S3**

GAMM estimates for bilateral amygdala volume across both sexes in manual tracing, volBrain, CS-FS, LG-FS and FSL segmentation separately, including a linear growth model of ICV.

| ICV measure method | Amygdala measure method | Hemisphere     | Best model fit  | R <sup>2</sup> (adjusted) | ICV      |      |       |              | Sex      |      |      |              | Age spline |        |       |              |
|--------------------|-------------------------|----------------|-----------------|---------------------------|----------|------|-------|--------------|----------|------|------|--------------|------------|--------|-------|--------------|
|                    |                         |                |                 |                           | Estimate | SE   | t     | P-value      | Estimate | SE   | t    | P-value      | edf        | Red.df | F     | P-value      |
| volBrain           | Manual                  | Left amygdala  | ICV + age       | 0.25                      | 0.00     | 0.00 | 9.25  | <b>0.000</b> |          |      |      |              | 1.00       | 1.00   | 3.57  | 0.059        |
|                    |                         | Right amygdala | ICV + age       | 0.28                      | 0.00     | 0.00 | 9.77  | <b>0.000</b> |          |      |      |              | 1.00       | 1.00   | 5.40  | <b>0.021</b> |
|                    | volBrain                | Left amygdala  | ICV + age       | 0.27                      | 0.00     | 0.00 | 10.02 | <b>0.000</b> |          |      |      |              | 1.36       | 1.36   | 3.55  | <b>0.035</b> |
|                    |                         | Right amygdala | ICV + age       | 0.28                      | 0.00     | 0.00 | 10.04 | <b>0.000</b> |          |      |      |              | 1.00       | 1.00   | 5.76  | <b>0.017</b> |
| FreeSurfer         | Manual                  | Left amygdala  | ICV + sex + age | 0.23                      | 0.00     | 0.00 | 5.22  | <b>0.000</b> | 0.07     | 0.02 | 2.89 | <b>0.004</b> | 1.00       | 1.00   | 1.72  | 0.191        |
|                    |                         | Right amygdala | ICV + age       | 0.23                      | 0.00     | 0.00 | 8.30  | <b>0.000</b> |          |      |      |              | 1.00       | 1.00   | 0.61  | 0.434        |
|                    | FreeSurfer              | Left amygdala  | ICV + age       | 0.27                      | 0.00     | 0.00 | 9.60  | <b>0.000</b> |          |      |      |              | 1.00       | 1.00   | 4.03  | <b>0.045</b> |
|                    |                         | Right amygdala | ICV + sex + age | 0.35                      | 0.00     | 0.00 | 7.81  | <b>0.000</b> | 0.09     | 0.03 | 3.21 | <b>0.001</b> | 1.00       | 1.00   | 1.19  | 0.275        |
| FSL                | Manual                  | Left amygdala  | ICV + age       | 0.25                      | 0.00     | 0.00 | 9.22  | <b>0.000</b> |          |      |      |              | 1.00       | 1.00   | 3.46  | 0.064        |
|                    |                         | Right amygdala | ICV + age       | 0.28                      | 0.00     | 0.00 | 9.78  | <b>0.000</b> |          |      |      |              | 1.00       | 1.00   | 5.27  | <b>0.022</b> |
|                    | FSL                     | Left amygdala  | ICV + age       | 0.14                      | 0.00     | 0.00 | 3.05  | <b>0.002</b> |          |      |      |              | 3.07       | 3.07   | 18.39 | <b>0.000</b> |
|                    |                         | Right amygdala | ICV + age       | 0.11                      | 0.00     | 0.00 | 3.70  | <b>0.000</b> |          |      |      |              | 2.53       | 2.53   | 10.07 | <b>0.000</b> |

Smooth function (edf) as well as degrees of freedom (Ref.df) and *F*-statistic and associated *p*-value (**bold** highlights *p* < .05) for age.
